# Supplementary material for: Helical polyisocyanide-based macroporous organic catalysts for asymmetric Michael addition with high efficiency and stereoselectivity
Source: Royal Society of Chemistry journal article supplement (doi:10.1039/d4sc01316f), 2024-01-01
Supplement: d4sc01316f1.pdf [file d4sc01316f1.pdf]

Electronic Supplementary Material (ESI) for Chemical Science.  
This journal is © The Royal Society of Chemistry 2021

## Electronic Supplementary Information

# Helical Polyisocyanide-based Macroporous Organic Catalysts for Asymmetric Michael Addition with High Efficiency and Stereoselectivity

*Xun-Hui Xu,<sup>a,d</sup> Run-Tan Gao,<sup>b</sup> Shi-Yi Li,<sup>b</sup> Li Zhou,<sup>a,\*</sup> Na Liu,<sup>c</sup> and Zong-Quan Wu<sup>b,\*</sup>*

<sup>a</sup>Department of Polymer Science and Engineering, School of Chemistry and Chemical Engineering, and Anhui Province Key Laboratory of Value-Added Catalytic Conversion and Reaction Engineering, Hefei University of Technology, Hefei 230009, Anhui Province, China

<sup>b</sup>State Key Laboratory of Supramolecular Structure and Materials, College of Chemistry, Jilin University, Changchun, Jilin 130012, China

<sup>c</sup>The School of Pharmaceutical Sciences, Jilin University, 1266 Fujin Road, Changchun, Jilin 130021, P.R. China

<sup>d</sup>Beijing National Laboratory for Molecular Sciences, Key Laboratory of Polymer Chemistry and Physics of Ministry of Education, College of Chemistry and Molecular Engineering, Peking University, Beijing 100871, China



## Table of Contents

|                                                                                                                                                |         |
|------------------------------------------------------------------------------------------------------------------------------------------------|---------|
| Measurements .....                                                                                                                             | S3      |
| Materials .....                                                                                                                                | S3      |
| Synthetic procedures .....                                                                                                                     | S4-S6   |
| Procedure for Michael addition reaction .....                                                                                                  | S6-S7   |
| NMR relaxation measurement .....                                                                                                               | S7      |
| Wetted surface area calculated from NMR relaxation .....                                                                                       | S7      |
| Kinetic studies .....                                                                                                                          | S7      |
| Characterization data for Michael addition products .....                                                                                      | S8-S9   |
| <b>Table S1.</b> Characterization data for 4-poly- <b>1</b> <sub>m</sub> s .....                                                               | S10     |
| <b>Table S2.</b> Results of Michael addition reaction using recycled C-poly- <b>3</b> <sub>150</sub> .....                                     | S10     |
| <b>Figure S1.</b> <sup>1</sup> H NMR spectrum of 4-poly- <b>1</b> <sub>20</sub> .....                                                          | S11     |
| <b>Figure S2.</b> FT-IR spectra of 4-poly- <b>1</b> <sub>20</sub> , C-poly- <b>1</b> <sub>20</sub> and C-poly- <b>3</b> <sub>20</sub> .....    | S11     |
| <b>Figure S3.</b> CD and UV-vis spectra of 4-poly- <b>1</b> <sub>m</sub> s .....                                                               | S12     |
| <b>Figure S4.</b> <sup>1</sup> H NMR spectrum of C-poly- <b>1</b> <sub>20</sub> .....                                                          | S12     |
| <b>Figure S5.</b> CD and UV-vis spectra of C-poly- <b>1</b> <sub>m</sub> s .....                                                               | S13     |
| <b>Figure S6.</b> <sup>1</sup> H NMR spectrum of C-poly- <b>3</b> <sub>20</sub> .....                                                          | S13     |
| <b>Figure S7.</b> Plots of ellipticity at 364 nm of C-poly- <b>3</b> <sub>m</sub> s .....                                                      | S14     |
| <b>Figure S8.</b> Nitrogen sorption isotherms and pore size distributions of C-poly- <b>1</b> <sub>m</sub> s .....                             | S14     |
| <b>Figure S9.</b> Plots of $S_{\text{BET}}$ , $V_{\text{pore}}$ and pore size of C-poly- <b>3</b> <sub>m</sub> s as a function of the DP ..... | S15     |
| <b>Figure S10.</b> PXRD profiles of C-poly- <b>1</b> <sub>m</sub> s and the C-poly- <b>3</b> <sub>m</sub> s .....                              | S15     |
| <b>Figure S11.</b> Plots of $2\theta$ of C-poly- <b>3</b> <sub>m</sub> s as a function of the DP .....                                         | S16     |
| <b>Figure S12.</b> <sup>1</sup> H NMR spectrum of compound <b>7</b> .....                                                                      | S16     |
| <b>Figure S13.</b> The yields of <b>6aa</b> catalyzed by C-poly- <b>3</b> <sub>m</sub> s .....                                                 | S17     |
| <b>Figure S14.</b> $T_2$ relaxation curve and distributions arising of water .....                                                             | S17     |
| <b>Figure S15.</b> Time-dependent HPLC curves of <i>trans</i> -nitrostyrene .....                                                              | S18     |
| <b>Figure S16-S20.</b> <sup>1</sup> H NMR spectra for Michael addition products .....                                                          | S18-S20 |
| <b>Figure S21-S23.</b> <sup>1</sup> H NMR spectra for 4-Pd(II), monomer <b>1</b> , cross-linker <b>2</b> and <b>7</b> .....                    | S21-S22 |
| <b>Figure S24-S33.</b> HPLC curves for Michael addition products .....                                                                         | S22-S27 |
| <b>References</b> .....                                                                                                                        | S28     |

## Measurements

The NMR spectra were recorded using a Bruker 600 MHz spectrometer {H}. Size exclusion chromatography (SEC) was performed on Waters 1515 pump and Waters 2414 differential refractive index (RI) detector (set at 40 °C) using a series of two linear TSK gel GMHHR-H columns. Molecular weight ( $M_n$ ) and its dispersity ( $M_w/M_n$ ) were reported relative to polystyrene standards. The eluent was tetrahydrofuran (THF) at a flow rate of 0.8 mL/min. FT-IR spectra were recorded on Perkin-Elmer Spectrum BX FTIR system using KBr pellets. Circular dichroism (CD) spectra were obtained in a 1.0 or 0.1 cm quartz cell using a JASCO J1500 spectropolarimeter. The UV-vis absorption spectra were recorded on a UNIC 4802 UV/vis double beam spectrophotometer. The optical rotations were performed at 25 °C using a 10.0 cm quartz cell on a WZZ-2B polarimeter. High performance liquid chromatography (HPLC) with UV-vis detector was carried out on SHIMADZU LC-20AT equipment using chiral columns. Scanning electron microscopy (SEM) was performed on a SU8020 operating at 5.0 kV accelerating voltage. Nitrogen gas sorption experiments were carried out on Autosorb iQ Station 1 volumetric gas sorption instrument. Before measurement, the samples were degassed under vacuum at 80 °C for 12 h. The Brunauer Emmett-Teller (BET) method was utilized to calculate the specific surface areas. By using the nonlocal density functional theory (DFT) model, the pore volume was derived from the sorption curve. X-ray diffraction measurements were conducted by using a Bruker D8 advance X-ray powder diffractometer with  $\text{CuK}_\alpha$  (1.541 Å) radiation (40 kV, 40 mA) and samples were exposed at a scan rate of  $2\theta = 0.02^\circ/\text{s}$  in the range between  $3^\circ$  and  $40^\circ$ . The benchtop time-domain NMR device (VTMR20-010V-I) was measured to the spin-spin relaxation time ( $T_2$ ). The concentration of Pd in C-poly-**1**<sub>m</sub>s and C-poly-**3**<sub>m</sub>s were measured by Inductively Coupled Plasma Mass Spectrometry (ICP-MS) NexION 350X device.

## Materials

All solvents were obtained from Sinopharm. Co. Ltd., and were purified by the standard procedures before use. All chemicals were purchased from Aladdin, Sinopharm, and Sigma-Aldrich Chemical Co. Ltd., and were used as received without further purification otherwise denoted. The Pd(II) catalyst, 4-Pd(II), isocyanide monomer **1**, cross-linker **2**, and linear poly-**1**<sub>150</sub> were prepared according to the procedures reported by our group previously, and the structure was confirmed by <sup>1</sup>H NMR, <sup>13</sup>C NMR spectra, FT-IR and MS m/z.<sup>1,2</sup>

## Synthetic procedures

### Scheme S1. Synthesis of 4-Pd (II) catalyst.

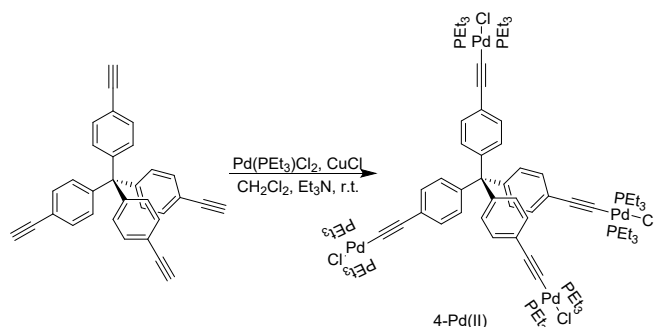

**Synthesis of 4-Pd(II) catalyat.**<sup>1</sup> Tetrakis(4-ethynylphenyl)methane (200 mg, 0.49 mmol), *trans*-dichlorobis(triethylphosphine)palladium (820 mg, 2.0 mmol), and cuprous(I) chloride (2.5 mg, 0.025 mmol) were dissolved in the mixture of triethylamine (10 mL) and dichloromethane (10 mL) under dry nitrogen atmosphere. The mixture was stirred at room temperature for 2 h, then the solvent was removed by evaporation under reduced pressure. The afforded residue was purified by chromatography using petroleum ether as eluent. The crude product was recrystallized from petroleum ether and methanol to afford the expected 4-Pd(II) catalyst as a white solid (633 mg, 62% yield). <sup>1</sup>H NMR (600 MHz, CDCl<sub>3</sub>, 25 °C):  $\delta$  7.13–7.08 (d,  $J$  = 6.0 Hz, 8H, ArH), 7.09–7.07 (d,  $J$  = 6.0 Hz, 8H, ArH), 1.98–1.96 (m, 12H, CH<sub>2</sub>), 1.23–1.18 (m, 18H, CH<sub>3</sub>).

### Scheme S2. Synthesis of monomer 1

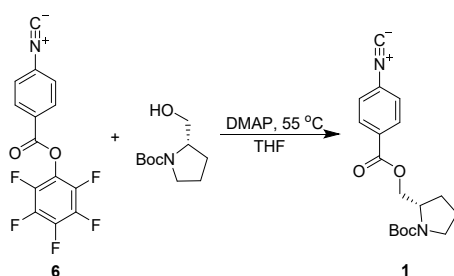

**Synthesis of monomer 1:**<sup>2</sup> The monomer **1** was synthesized according to Scheme S2. isocyanide monomer (**6**) carrying pentafluorophenol ester was first prepared followed the procedure reported by our group previously and the structure was confirmed by <sup>1</sup>H NMR.<sup>4</sup> A mixed solution of monomer **6** (4.82 g, 15.2 mmol), *tert*-butyl-(*S*)-2-(hydroxymethyl)pyrrolidine-1-carboxylate (3.02 g, 15.4 mmol), and 4-*N,N*-dimethylaminopyridine (DMAP, 1.36 g, 11.2 mmol) in dry THF (20 mL) was stirred at 55 °C for 12 h under nitrogen atmosphere. Then the solvent was removed by evaporation under reduced pressure. The residue was re-dissolved in CH<sub>2</sub>Cl<sub>2</sub> (25 mL) and washed with water (50 mL  $\times$  2) and an aqueous solution of sodium bicarbonate (50 mL  $\times$  2). The

organic layer was dried over magnesium sulfate (MgSO<sub>4</sub>) and purified by flash column chromatography using petroleum ether and ethyl acetate as eluent (v/v = 8/1) to afford monomer **1** as a colorless oil (4.32 g, 87% yield). <sup>1</sup>H NMR (600 MHz, CDCl<sub>3</sub>, 25 °C): δ 8.12–8.08 (d, *J* = 12.0 Hz, 2H, ArH), 7.46–7.43 (d, *J* = 12.0 Hz, 2H, ArH), 4.42–4.22 (m, 2H, OCH<sub>2</sub>), 4.08 (m, 1H, NCH), 3.46–3.39 (m, 2H, NCH<sub>2</sub>), 1.93–1.74 (m, 4H, CH<sub>2</sub>), 1.44 (s, 9H, CH<sub>3</sub>).

**Scheme S3.** Synthesis of Cross-linker **2**

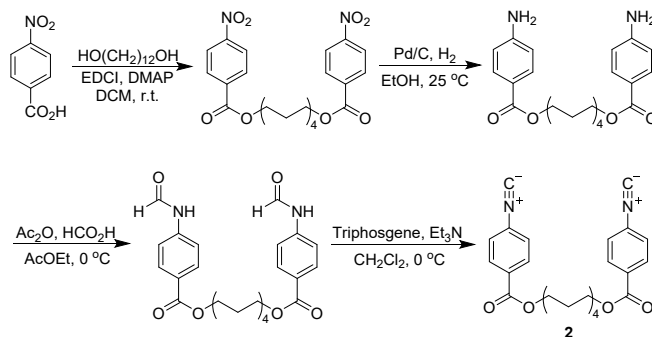

**Synthesis of cross-linker 2:** As displayed in Scheme S3, cross-linker (**2**) was prepared according the reported literature and the structure was confirmed by <sup>1</sup>H NMR.<sup>3</sup> <sup>1</sup>H NMR (600 MHz, CDCl<sub>3</sub>, 25 °C): δ 8.12–8.05 (d, *J* = 12.0 Hz, 4H, ArH), 7.53–7.37 (d, *J* = 6.0 Hz, 4H, ArH), 4.28 (t, *J* = 6.0 Hz, 4H, CO<sub>2</sub>CH<sub>2</sub>), 1.87–1.25 (m, 20H, CH<sub>2</sub>).

**Typical synthesis procedure for 4-poly-*I<sub>m</sub>*s:** These polymers were prepared according to Scheme 1 in the main text.<sup>3</sup> Taking 4-poly-**1**<sub>200</sub> as an example. A 10 mL oven-dried flask was charged with monomer **1** (0.20 g, 0.61 mmol), 4-Pd(II) catalyst (1.50 mg, 7.59 × 10<sup>-4</sup> mmol), dry CHCl<sub>3</sub> (3.0 mL) and a stir bar. The concentrations of monomer **1** and the 4-Pd(II) complex were 0.2 and 2.5 × 10<sup>-4</sup> M, respectively ([**1**]<sub>0</sub>/[Pd]<sub>0</sub> = 200). The reaction flask was then immersed into an oil bath at 55 °C and stirred overnight. After cooled to room temperature, the polymerization solution was precipitated into a large amount of *n*-hexane, collected by centrifugation, and dried in vacuum at room temperature overnight to afford 4-poly-**1**<sub>200</sub> as a brown solid (0.16 g, 81% yield). [α]<sup>25</sup><sub>D</sub> = -218 (*c* = 0.20, THF). SEC: *M<sub>n</sub>* = 72.5 kDa, *M<sub>w</sub>*/*M<sub>n</sub>* = 1.22. <sup>1</sup>H NMR (600 MHz, CDCl<sub>3</sub>, 25 °C): δ 7.41 (br, 2H, ArH), 5.70 (br, 2H, ArH), 3.92 (br, 3H, OCH<sub>2</sub> and NCH), 3.36 (br, 2H, NCH<sub>2</sub>), 1.75 (br, 4H, (CH<sub>2</sub>)<sub>2</sub>), 1.40 (br, 9H, CH<sub>3</sub>). FT-IR (KBr, 25 °C, cm<sup>-1</sup>): 2995 (ν<sub>C-H</sub>), 1728 (ν<sub>C=O</sub>), 1605 (ν<sub>C=N</sub>).

**Synthesis procedure for poly-*I*<sub>150</sub>:**<sup>2</sup> The methoxy phenylethynyl Pd(II) complex and linear polymer were synthesized according to the procedure reported by our group previously.

**Typical synthesis procedure for C-poly-1<sub>m</sub>s:** These polymers were prepared according to Scheme 1 in the main text.<sup>3</sup> Taking C-poly-1<sub>200</sub> as an example. A 10 mL oven-dried flask was charged with 4-poly-1<sub>200</sub> (160 mg), the solution of linker **2** in CHCl<sub>3</sub> (22.5 μL (*c* = 8.0 mg/mL), 0.18 mg, 3.9 × 10<sup>-4</sup> mmol), dry CHCl<sub>3</sub> (2.0 mL) and a stir bar. The reaction flask was then immersed into an oil bath at 55 °C and stirred overnight. After cooled to room temperature, the polymerization solution was precipitated into a large amount of methanol, the precipitated solid was collected by centrifugation, and dried in vacuum at room temperature overnight to afford C-poly-1<sub>200</sub> as a brown solid (152 mg, 98% yield). After dissolving the collected polymer in benzene (10.0 mL), it was freeze-dried for 24 hours, and afforded the desired C-poly-1<sub>200</sub>. <sup>1</sup>H NMR (600 MHz, CDCl<sub>3</sub>, 25 °C): δ 7.41 (br, 2H, ArH), 5.70 (br, 2H, ArH), 3.92 (br, 3H, CHCH<sub>2</sub>), 3.36 (br, 2H, NCH<sub>2</sub>), 1.75 (br, 4H, (CH<sub>2</sub>)<sub>2</sub>), 1.41 (br, 9H, CH<sub>3</sub>). FT-IR (KBr, 25 °C, cm<sup>-1</sup>): 2998 (ν<sub>C-H</sub>), 1735 (ν<sub>C=O</sub>), 1612 (ν<sub>C=N</sub>).

**Typical synthesis procedure for C-poly-3<sub>m</sub>s:** Taking C-poly-3<sub>150</sub> as an example.<sup>2</sup> C-poly-1<sub>150</sub> (150 mg) was dispersed in dry CH<sub>2</sub>Cl<sub>2</sub> (5.0 mL), trifluoroacetic acid (TFA, 0.5 mL) was slowly added to the stirring solution at 0 °C. After the resulting suspension was stirred at room temperature overnight, the solution was adjusted to pH = 8.5 by ammonium hydroxide. After concentrated to dryness, the resulting residue was dissolved in MeOH (2.0 mL), then the suspension was washed with copious amounts of ether, collected by centrifugation, and dried in vacuum at room temperature overnight to afford the desired C-poly-3<sub>150</sub> as a yellow solid. (88.9 mg, 85% yield). <sup>1</sup>H NMR (600 MHz, CD<sub>3</sub>OD, 25 °C): δ 7.40 (br, 2H, ArH), 6.85 (br, 1H, NH), 5.91 (br, 2H, ArH), 4.27 (br, 1H, CH), 3.75 (br, 2H, CH<sub>2</sub>), 2.04 (br, 4H, (CH<sub>2</sub>)<sub>2</sub>). FT-IR (KBr, 25 °C, cm<sup>-1</sup>): 3220 (ν<sub>N-H</sub>), 2925 (ν<sub>C-H</sub>), 1720 (ν<sub>C=O</sub>), 1588 (ν<sub>C=N</sub>).

**General procedure for Michael addition reaction:** Polymer catalyst C-poly-3<sub>150</sub> with 30% loading (with respect to repeating units) was added to the stirring solution of cyclohexanone (0.80 mmol) in expected solvent.<sup>4</sup> Nitrostyrene (0.20 mmol) was added to this solution, and the resulting solution was stirred at a specific temperature indicated in Table 2 in the main text. After the reaction was accomplished, diethyl ether was added to the solution which caused the polymer catalyst precipitated. After centrifugation to remove the solid, the solution was concentrated under reduced pressure and the crude product was purified by preparative thin layer chromatography (TLC) on silica gel using petroleum ether and ethyl acetate as an eluent to afford the product. Taking the reaction of cyclohexanone with nitrostyrene as an example. C-poly-3<sub>150</sub> (20.0 mg, 0.06 mmol, with respect to repeating units) was added to the stirring solution of cyclohexanone (8.0 mg, 0.80 mmol) in brine. Then nitrostyrene (29.6 mg, 0.20 mmol) was added to this solution via a microsyringe. The resulting solution was stirred at room temperature and followed by thin layer chromatography (TLC). After the reaction was accomplished, diethyl ether was added to the solution which caused the polymer catalyst precipitated. After centrifugation to remove the solid, the solution was concentrated under reduced

pressure and the crude product was purified by preparative thin layer chromatography (TLC) on silica gel using petroleum ether and ethyl acetate as an eluent to afford the product.

**NMR relaxation measurement.** <sup>[5,6]</sup> The C-poly-**3**<sub>150</sub> was immersed in deionized water prior to NMR relaxation measurements. The C-poly-**3**<sub>m</sub> was left in water for at least 24 h. Concentrations 10 wt % of C-poly-**3**<sub>150</sub> in water were prepared for the NMR relaxation measurements. A homogeneous and stable suspension without aggregation of C-poly-**3**<sub>150</sub> particles was prepared by mixing the samples in an ultrasonic bath until visible particle agglomerates disappeared. The temperature of the device was stabilized at 25 °C with an external thermostat during the measurements. Measurements were performed by measuring the suspensions in 5 mm NMR tubes.  $T_2$  was determined using the “T2Bulk” method, which is based on the CPMG method. For this method, 5 Scans were used, a repetition time of 1 min, 50000 echoes and a CPMG echo time of 1 ms.

**Wetted surface area calculated from NMR relaxation.** the NMR relaxation time can be converted into the surface area by means of a straightforward calculation.

$$R_{av} = p_s R_s + p_b R_b$$

$$R_{av} = \psi_p S L \rho_p [R_s - R_b] + R_b$$

where  $p_s$  and  $p_b$  are the fractions of solvent in the bulk and surface respectively.  $R_s$  is the relaxation rate for the bound liquid, and  $R_b$  is the relaxation rate for the free or bulk liquid. Defining the spin relaxation rate constant  $R_s$  and  $R_b$  as the reciprocal of the spin relaxation time  $T_s$  and  $T_b$ . where  $R_{av}$  is the average spin relaxation rate.  $\psi_p$  is the particle volume to liquid volume ratio;  $S$  is the total surface area per unit mass;  $\rho_p$  is the bulk particle density;  $L$  is the thickness of the liquid surface layer. It is commonly assumed that  $L$  is a single solvent diameter though there.

**Kinetic studies.** A stirred solution of *trans*-nitrostyrene (30.0 mg, 0.2 mmol), internal standard 1,4-dimethoxybenzene (7.0 mg, 0.05 mmol), and cyclohexanone (78.7 mg, 0.8 mmol) were added to a solution of polymer catalyst in brine (1.0 mL) with 10 mol% catalyst loading. The reaction solution was stirred at -10 °C for one week. A series of aliquots were taking out from the reaction solution at appropriate time intervals for further analyses. The conversion of substrate *trans*-nitrostyrene was calculated based on the peak area of unreacted *trans*-nitrostyrene relative to that of the internal standard 1,4-dimethoxybenzene on the basis of the linear calibration curve.

Other Michael addition reactions were performed under the similar procedure and the characterization data for the products are showed below.



### Characterization data for Michael addition products

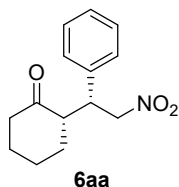

(*S*)-2-((*R*)-2-nitro-1-phenylethyl)cyclohexanone (**6aa**):  $^1\text{H}$  NMR (600 MHz,  $\text{CDCl}_3$ , 25  $^\circ\text{C}$ ):  $\delta$  7.33 (d,  $J = 6.0$  Hz, 2H), 7.32–7.25 (m, 2H), 7.17–7.16 (m, 1H), 4.95–4.92 (m, 1H), 4.70–4.66 (m, 1H), 4.02–3.98 (m, 0.1H, *anti* CH), 3.78–3.75 (m, 0.9H, *syn* CH), 2.75–2.71 (m, 1H), 2.70–2.66 (m, 1H), 2.45–2.37 (m, 1H), 2.27–2.18 (m, 1H), 2.04–1.82 (m, 4H), 1.59–1.53 (m, 1H). The enantiomeric excess (*ee*): 99%, and diastereomeric ratio (*dr*): 92/8 values were determined by chiral HPLC with a Chiralpack AS-H column at 254 nm (*n*-hexane/2-propanol = 90/10, v/v), at an eluent rate of 1.00 mL/min;  $t_{\text{R1}}$  (*anti.*) = 15.37 min,  $t_{\text{R2}}$  (*anti.*) = 20.35 min,  $t_{\text{R1}}$  (*syn.*) = 20.90 min,  $t_{\text{R2}}$  (*syn.*) = 24.33 min.

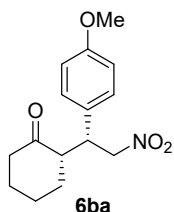

(*S*)-2-((*R*)-1-(4-methoxyphenyl)-2-nitroethyl)cyclohexanone (**6ba**):  $^1\text{H}$  NMR (600 MHz,  $\text{CDCl}_3$ , 25  $^\circ\text{C}$ ):  $\delta$  7.18 (d,  $J = 12.0$  Hz, 2H), 6.92 (d,  $J = 6.0$  Hz, 2H), 4.92–4.87 (m, 1H), 4.70–4.64 (m, 1H), 4.09 (s, 0.12H, *anti* CH), 4.06 (s, 3H), 4.01–3.95 (m, 0.91H, *syn* CH), 3.11–2.97 (m, 1H), 2.87–2.80 (m, 1H), 2.78–2.68 (m, 1H), 2.46–2.33 (m, 1H), 2.15–1.99 (m, 4H), 1.71–1.59 (m, 1H). The *ee*: 99%, and *dr*: 90/10, determined by chiral HPLC with a Chiralpack AD-H column at 254 nm (*n*-hexane/2-propanol = 80/20, v/v), at an eluent rate of 0.50 mL/min;  $t_{\text{R1}}$  (*anti.*) = 17.79 min,  $t_{\text{R2}}$  (*anti.*) = 19.87 min,  $t_{\text{R1}}$  (*syn.*) = 21.86 min,  $t_{\text{R2}}$  (*syn.*) = 23.52 min.

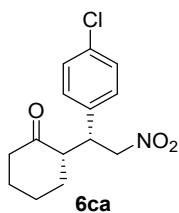

(*S*)-2-((*R*)-1-(4-chlorophenyl)-2-nitroethyl)cyclohexanone (**6ca**):  $^1\text{H}$  NMR (600 MHz,  $\text{CDCl}_3$ , 25  $^\circ\text{C}$ ):  $\delta$  7.30 (d,  $J = 12.0$  Hz, 2H), 7.16 (d,  $J = 6.0$  Hz, 2H), 4.93–4.87 (m, 1H), 4.75–4.68 (m, 1H), 4.08–3.98 (m, 0.04H, *anti* CH), 3.87–3.78 (m, 0.99H, *syn* CH), 2.83–2.70 (m, 1H), 2.61–2.54 (m, 1H), 2.54–2.43 (m, 1H), 2.14–2.03 (m, 1H), 1.90–1.76 (m, 4H), 1.55–1.41 (m, 1H). The *ee*: 99%, *dr*: 97/3, determined by chiral HPLC with a Chiralpack AD-H column at 254 nm (*n*-hexane/2-propanol = 90/10, v/v), at an eluent rate

of 0.50 mL/min;  $t_{R1}$  (*anti.*) = 12.26 min,  $t_{R2}$  (*anti.*) = 13.37 min,  $t_{R1}$  (*syn.*) = 15.32 min,  $t_{R2}$  (*syn.*) = 18.53 min.

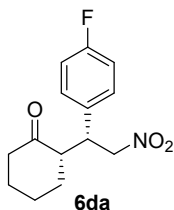

(*S*)-2-((*R*)-1-(4-fluorophenyl)-2-nitroethyl)cyclohexanone (**6da**):  $^1\text{H}$  NMR (600 MHz,  $\text{CDCl}_3$ , 25 °C):  $\delta$  7.20 (d,  $J$  = 12.0 Hz, 2H), 7.02 (d,  $J$  = 6.0 Hz, 2H), 4.95–4.90 (m, 1H), 4.75–4.69 (m, 1H), 4.08–4.04 (m, 0.05H, *anti* CH), 3.96–3.85 (m, 1.00H, *syn* CH), 2.89–2.74 (m, 1H), 2.64–2.58 (m, 1H), 2.57–2.44 (m, 1H), 2.38–2.25 (m, 1 H), 2.11–1.70 (m, 4H), 1.52–1.38 (m, 1H). The *ee*: 99%, *dr*: 94/6, determined by chiral HPLC with a Chiralpack AD-H column at 254 nm (*n*-hexane/2-propanol = 75/25, v/v), at an eluent rate of 0.70 mL/min;  $t_{R1}$  (*anti.*) = 10.79 min,  $t_{R2}$  (*anti.*) = 12.04 min,  $t_{R1}$  (*syn.*) = 12.99 min,  $t_{R2}$  (*syn.*) = 13.93 min.

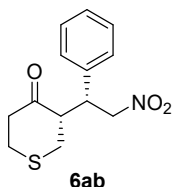

(*S*)-tetrahydro-3-((*R*)-2-nitro-1-phenylethyl)thiopyran-4-one (**6ab**):  $^1\text{H}$  NMR (600 MHz,  $\text{CDCl}_3$ , 25 °C):  $\delta$  7.34 (d,  $J$  = 12.0 Hz, 2H), 7.35 (m, 1H), 7.18 (d,  $J$  = 6.0 Hz, 2H), 4.94–4.85 (m, 2H), 4.65–4.55 (t, 1H), 4.08–4.03 (m, 1H), 3.87–3.60 (m, 4H), 3.36–3.27 (t, 1H), 3.05–2.98 (m, 1H), 2.85–2.74 (m, 1H), 2.73–2.66 (m, 1H). The *ee*: 99%, *dr*: 99/1, determined by chiral HPLC with a Chiralpack AD-H column at 254 nm (*n*-hexane/ 2-propanol = 85/15, v/v), at an eluent rate of 1.00 mL/min;  $t_{R1}$  (*syn.*) = 14.92 min,  $t_{R2}$  (*syn.*) = 16.32 min,  $t_{R1}$  (*anti.*) = 30.73 min,  $t_{R2}$  (*anti.*) = 32.73 min. where  $q_e$  (mg/g) is the amount of iodine adsorbed at equilibrium time,  $q_{max,e}$  (mg/g) is the maximum adsorption capacity of C-poly-**1**<sub>5</sub> at equilibrium,  $K$  ( $\text{mol}^{-1}$ ) is the equilibrium constant and  $c$  (mol/L) is the residual iodine concentration at equilibrium.

**Table S1.** Characterization Data for 4-poly-**1**<sub>m</sub>s<sup>a</sup>

| run | polymers                        | $M_n^b$ (kDa) | $M_w/M_n^b$ | Yield <sup>c</sup> | $\theta_{364}(\times 10^3)^d$ | $[\alpha]^{25}_D^e$ |
|-----|---------------------------------|---------------|-------------|--------------------|-------------------------------|---------------------|
| 1   | 4-poly- <b>1</b> <sub>20</sub>  | 13.8          | 1.19        | 89%                | -6.15                         | -118                |
| 2   | 4-poly- <b>1</b> <sub>50</sub>  | 22.0          | 1.22        | 92%                | -9.37                         | -172                |
| 3   | 4-poly- <b>1</b> <sub>80</sub>  | 30.5          | 1.23        | 91%                | -11.58                        | -190                |
| 4   | 4-poly- <b>1</b> <sub>100</sub> | 38.1          | 1.22        | 89%                | -13.02                        | -201                |
| 5   | 4-poly- <b>1</b> <sub>150</sub> | 57.9          | 1.24        | 90%                | -14.29                        | -210                |
| 6   | 4-poly- <b>1</b> <sub>200</sub> | 72.5          | 1.22        | 81%                | -14.51                        | -218                |

<sup>a</sup>The polymers were synthesized according to Scheme 1 in the main text. <sup>b</sup>The  $M_n$  and  $M_w/M_n$  were determined by SEC with equivalent to polystyrene standards. <sup>c</sup>Isolated yields. <sup>d</sup>The CD intensity at 364 nm of 4-poly-**1**<sub>m</sub>s measured in THF at 25 °C. <sup>e</sup>The optical rotations of 4-poly-**1**<sub>m</sub>s measured in THF at 25 °C.

**Table S2.** The recycled using of C-poly-**3**<sub>150</sub> in Michael addition reaction of cyclohexanone and *trans*-nitrostyrene<sup>a</sup>

| cycle | yield <sup>b</sup> (%) | <i>dr</i> <sup>c</sup> | <i>ee</i> <sup>d</sup> (%) |
|-------|------------------------|------------------------|----------------------------|
| 1     | 84                     | 92/8                   | 99                         |
| 2     | 80                     | 90/10                  | 99                         |
| 3     | 83                     | 91/9                   | 98                         |
| 4     | 82                     | 92/8                   | 97                         |
| 5     | 82                     | 91/9                   | 99                         |
| 6     | 84                     | 90/10                  | 98                         |

<sup>a</sup>The reactions were carried out with *trans*-nitrostyrene (0.20 mmol), cyclohexanone (0.80 mmol) in brine (1.0 mL) at 0 °C. <sup>b</sup>Yield of isolated products. <sup>c</sup>The *dr* values were determined by HPLC analysis using a chiral stationary phase. <sup>d</sup>The *ee* (%) values were referred to the major isomer determined by HPLC analysis using a chiral stationary phase.

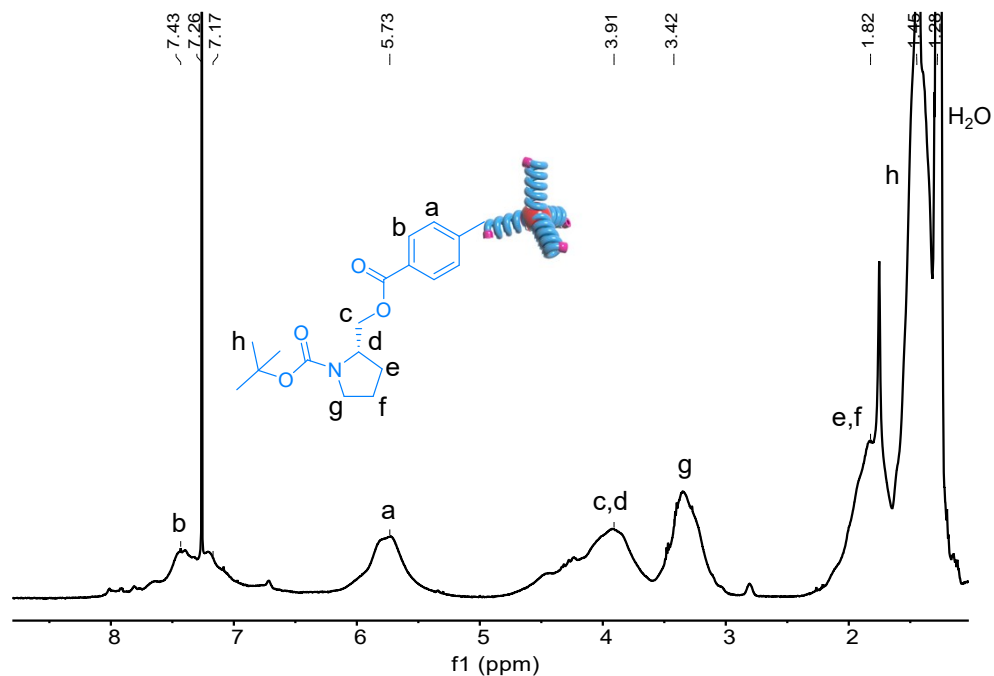

**Figure S1.**  $^1\text{H}$  NMR (600 MHz) spectrum of 4-poly- $1_{20}$  measured in  $\text{CDCl}_3$  at 25 °C.

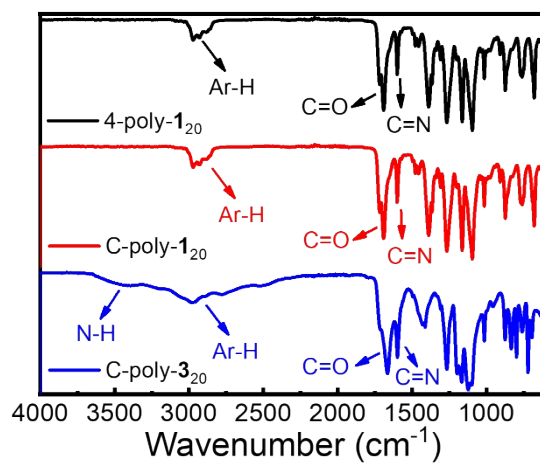

**Figure S2.** FT-IR spectra of 4-poly- $1_{20}$ , C-poly- $1_{20}$  and C-poly- $3_{20}$  measured at 25 °C using KBr pellets.

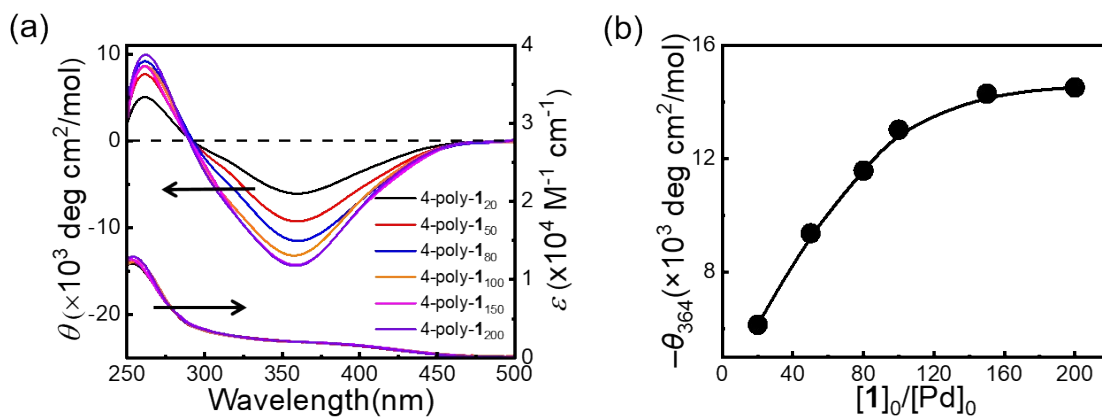

**Figure S3.** (a) CD and UV-vis spectra of 4-poly-1<sub>m</sub>s measured in THF at 25 °C ( $c = 0.2$  mg/mL). (b) Plots of ellipticity at 364 nm of 4-poly-1<sub>m</sub>s as a function of the  $[1]_0/[Pd]_0$ .

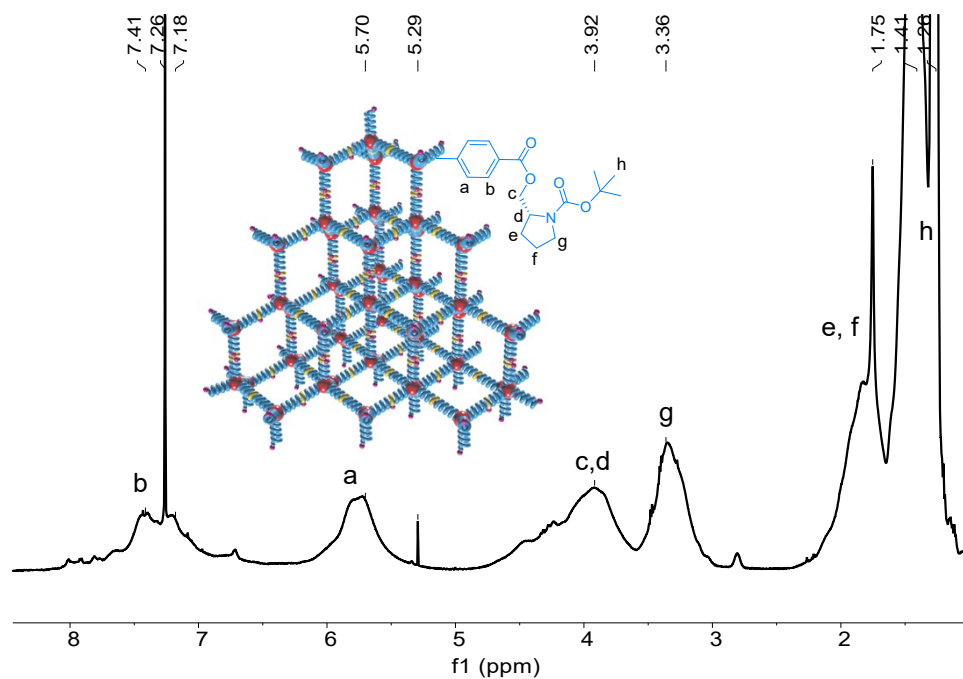

**Figure S4.** <sup>1</sup>H NMR (600 MHz) spectrum of C-poly-1<sub>20</sub> measured in CDCl<sub>3</sub> at 25 °C.

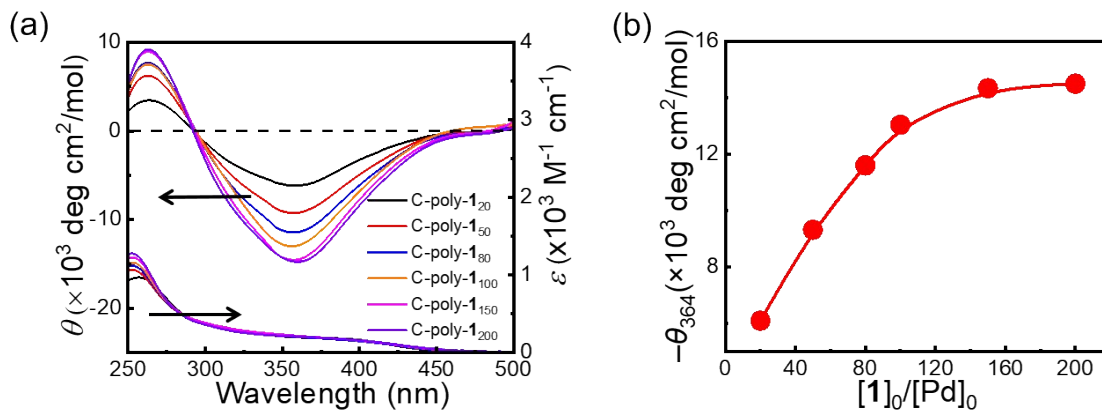

**Figure S5.** (a) The CD and UV-vis spectra of film state C-poly-1<sub>ms</sub> at 20 °C. (b) Plots of ellipticity at 364 nm of C-poly-1<sub>ms</sub> as a function of the  $[1]_0/[Pd]_0$ .

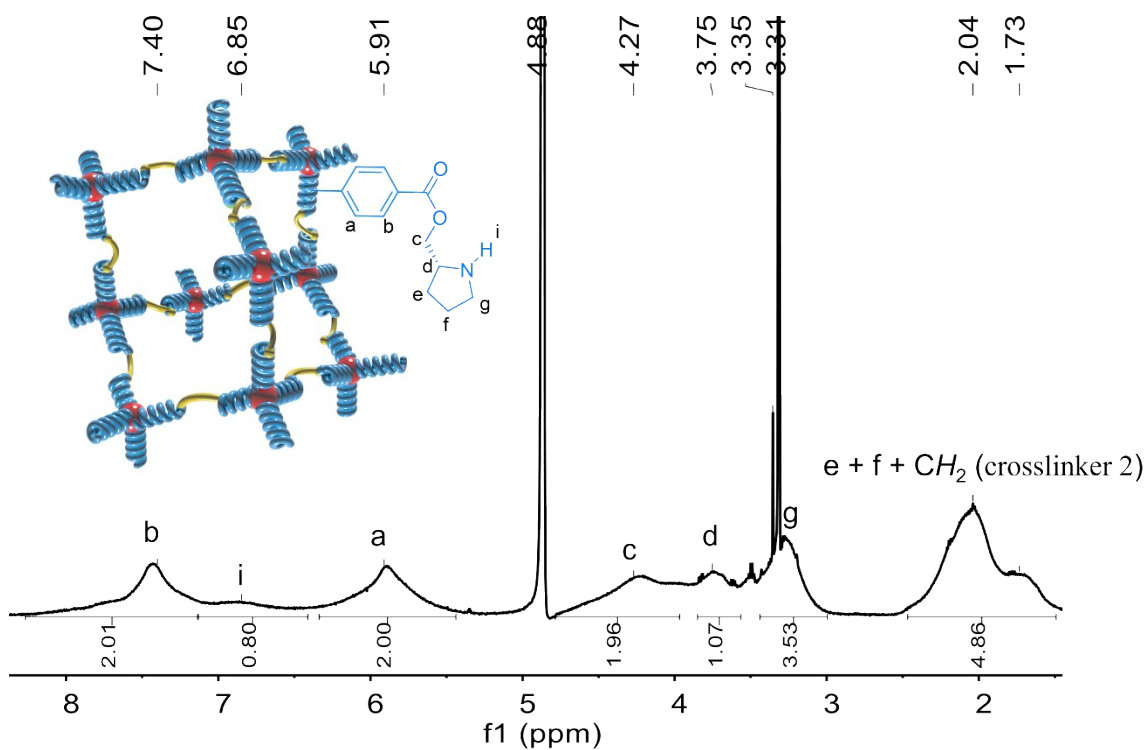

**Figure S6.**  $^1\text{H}$  NMR (600 MHz) spectrum of C-poly-3<sub>20</sub> measured in  $\text{CD}_3\text{OD}$  at 25 °C.

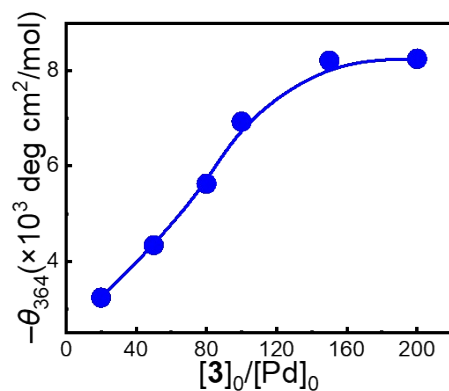

**Figure S7.** Plots of ellipticity at 364 nm of C-poly- $3_{m,s}$  as a function of the DP.

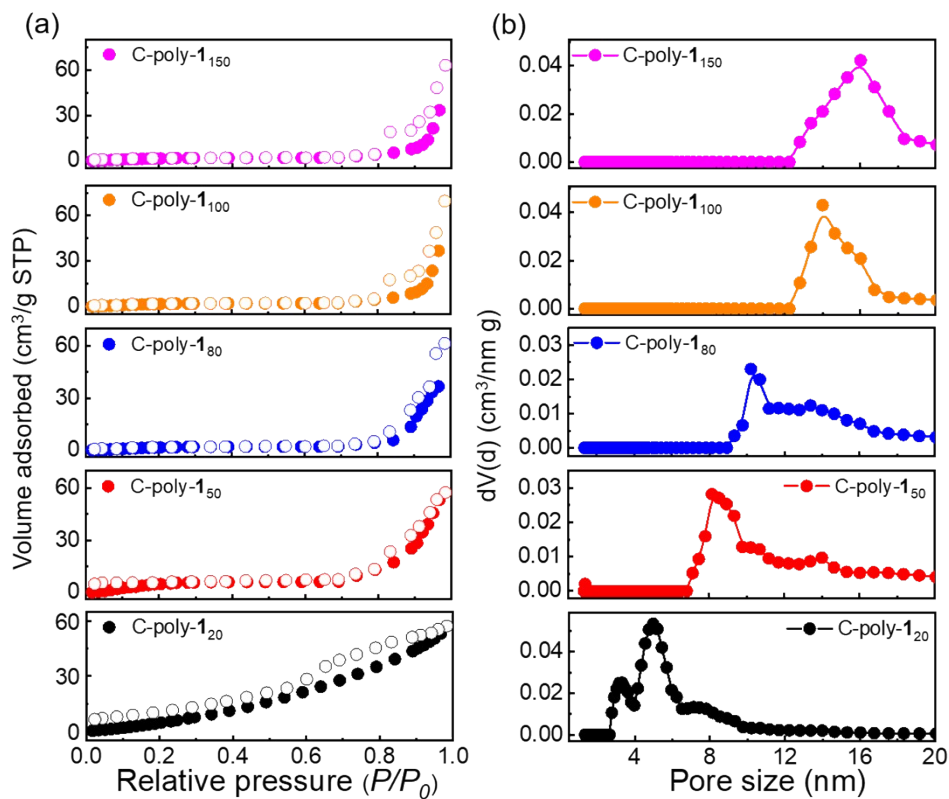

**Figure S8.** Nitrogen sorption isotherms (a), and pore size distributions (b) of C-poly- $1_{m,s}$  recorded at 77 K. Notably, the filled symbols denote gas adsorption while the empty symbols denote gas desorption in Figure (a).

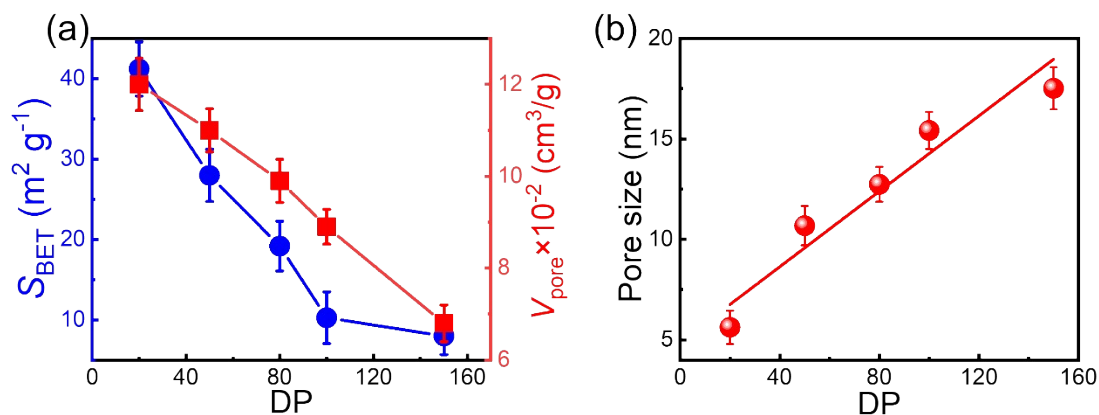

**Figure S9.** (a) Plots of  $S_{\text{BET}}$  and  $V_{\text{pore}}$  of C-poly-3<sub>m</sub>s as a function of the DP of the polyisocyanide blocks. (b) Plots of pore size of C-poly-3<sub>m</sub>s as a function of the DP of the polyisocyanide blocks.

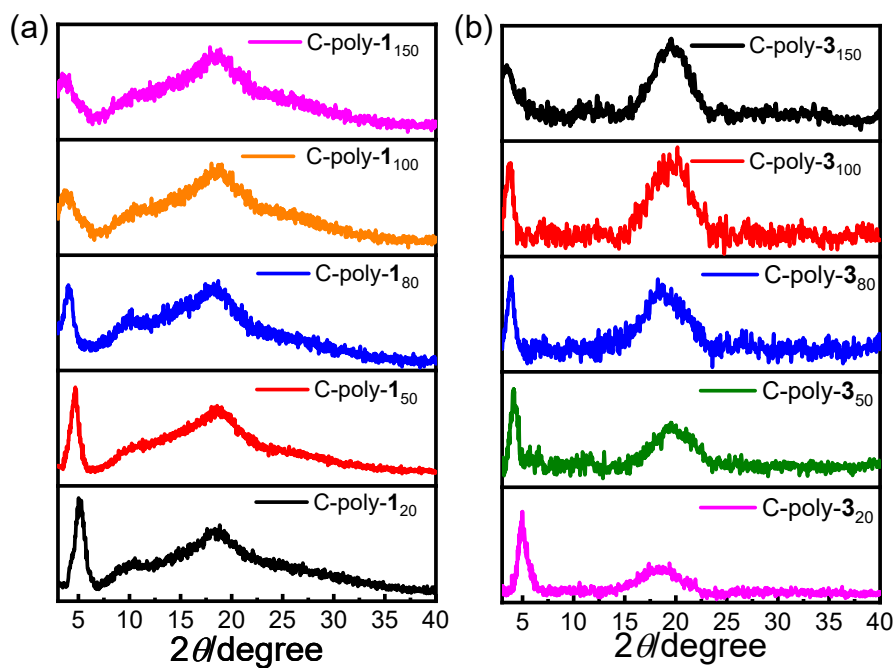

**Figure S10.** PXRD profiles of C-poly-1<sub>m</sub>s (a) and C-poly-3<sub>m</sub>s (b) with different lengths of polyisocyanide blocks.



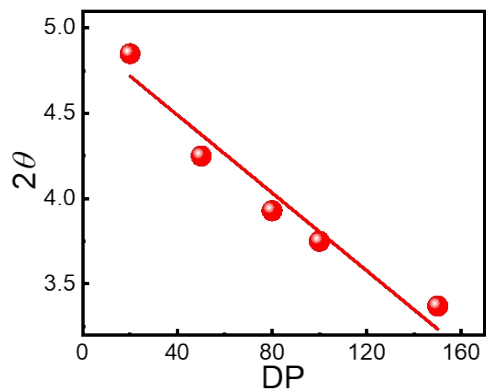

**Figure S11.** Plots of  $2\theta$  of C-poly-**3**<sub>m</sub>s as a function of the DP of the polyisocyanide blocks.

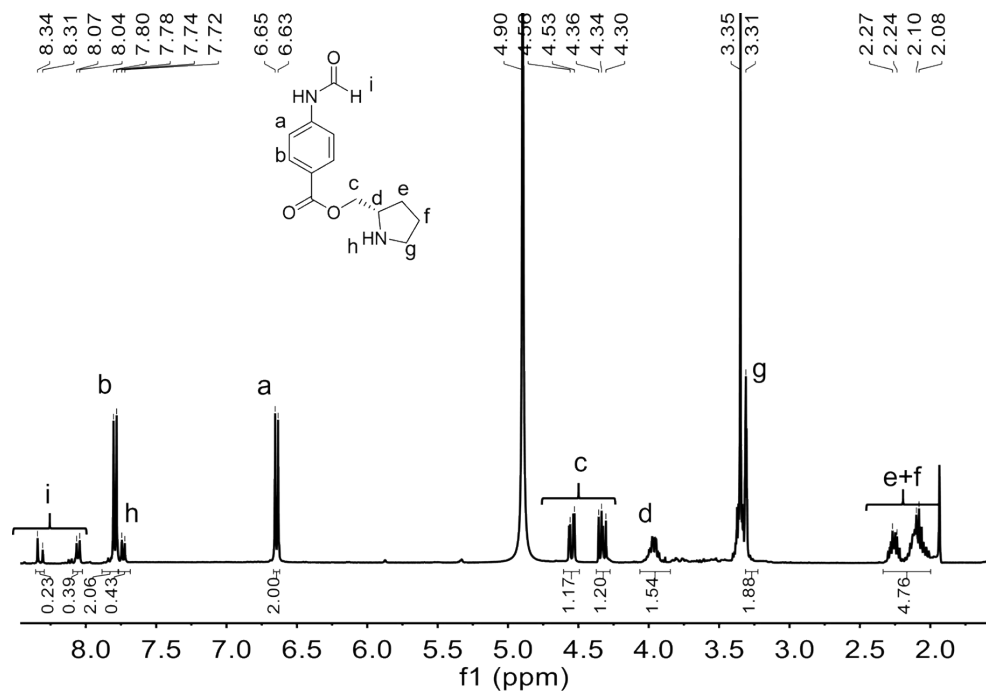

**Figure S12.**  $^1\text{H}$  NMR (600 MHz) spectrum of compound **7** measured in  $\text{CDCl}_3$  at  $25^\circ\text{C}$ .

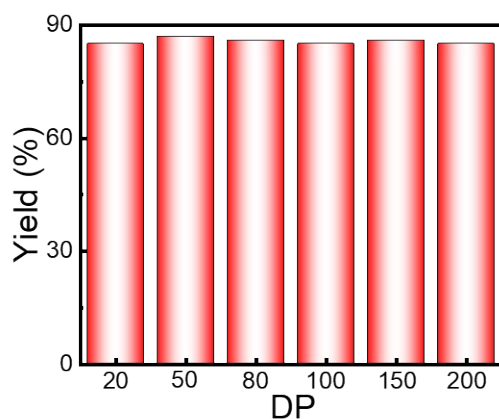

**Figure S13.** The yields of **6aa** catalyzed by C-poly-**3**<sub>ms</sub> with different DPs of the polyisocyanide blocks.

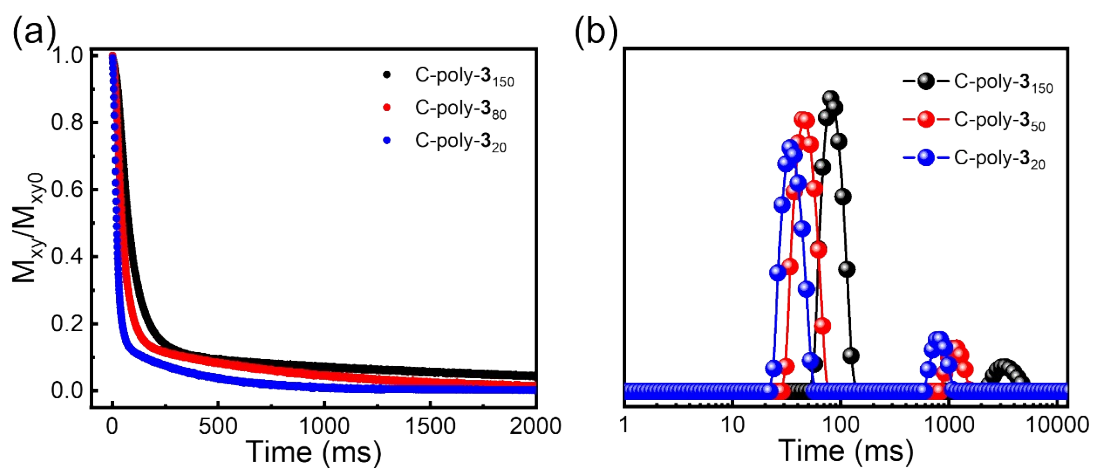

**Figure S14.** (a)  $T_2$  relaxation curve of water in comparison to 10 wt % of C-poly-**3**<sub>ms</sub> in water measured at 25 °C. (b) The  $T_2$  distributions arising from the ordinary CPMG applied on the emulsions tempered to 25 °C.

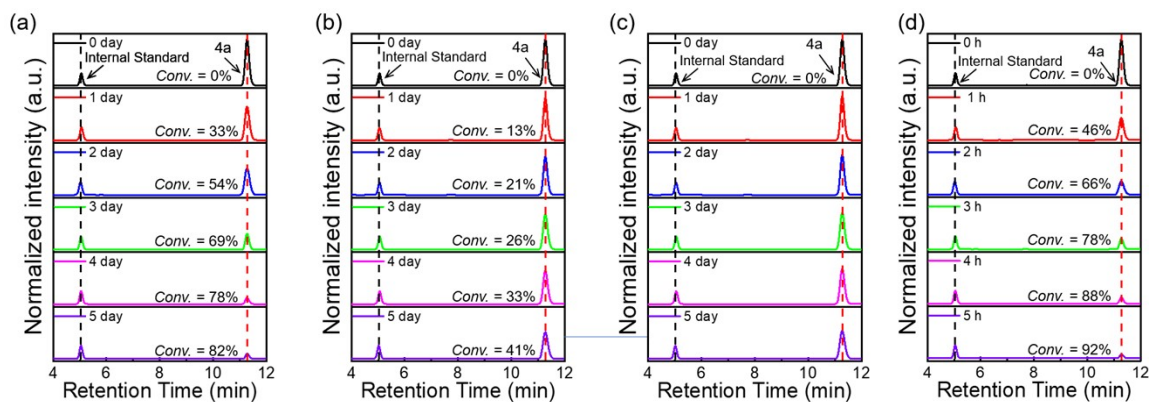

**Figure S15.** Time-dependent HPLC curves of *trans*-nitrostyrene catalyzed by C-poly-**3**<sub>150</sub> (a), poly-**3**<sub>150</sub> (b), C-poly-**3**<sub>150</sub> (c) and compound **7** (d) with the presence of 1,4-dimethoxybenzene as internal standard. HPLC conditions: column: AD-H; eluent: *n*-hexane/isopropanol = 9/1 (v/v); eluent rate: 0.75 mL/min.

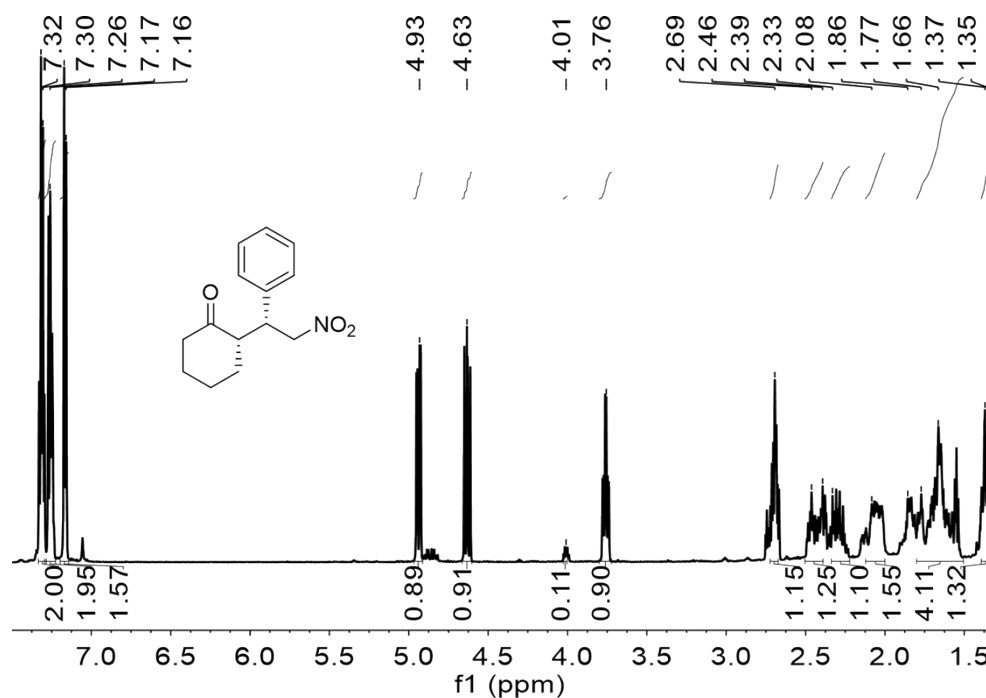

**Figure S16.** <sup>1</sup>H NMR (600 MHz) spectrum of (*S*)-2-((*R*)-2-nitro-1-phenylethyl)cyclohexanone (**6aa**) measured in CDCl<sub>3</sub> at 25 °C.

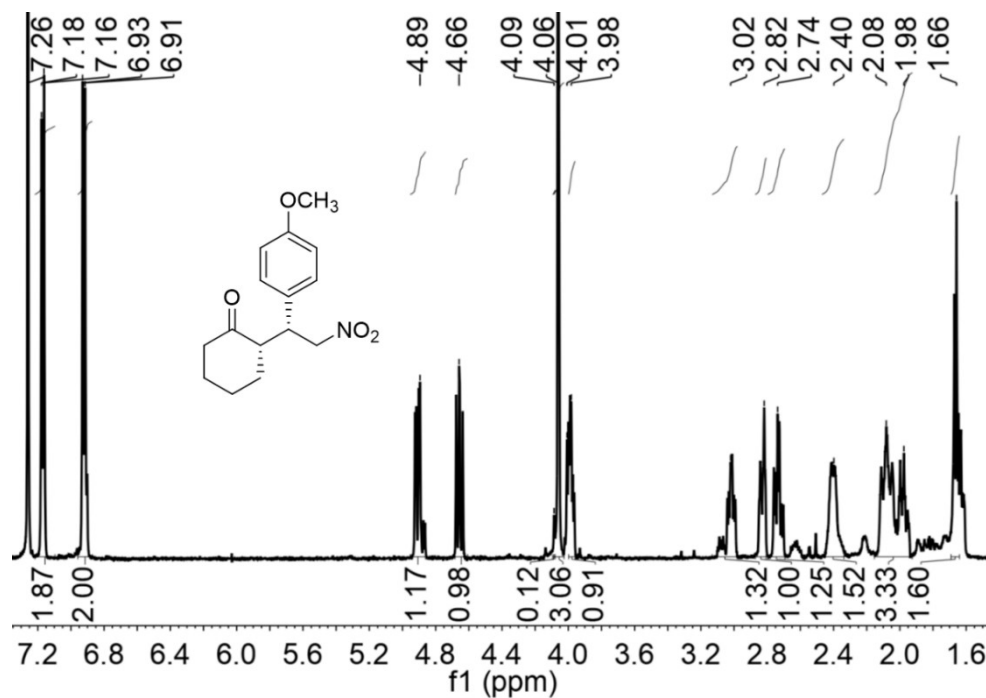

**Figure S17.**  $^1\text{H}$  NMR (600 MHz) spectrum of (*S*)-2-((*R*)-1-(4-methoxyphenyl)-2-nitroethyl)cyclohexanone (**6ba**) measured in  $\text{CDCl}_3$  at 25 °C.

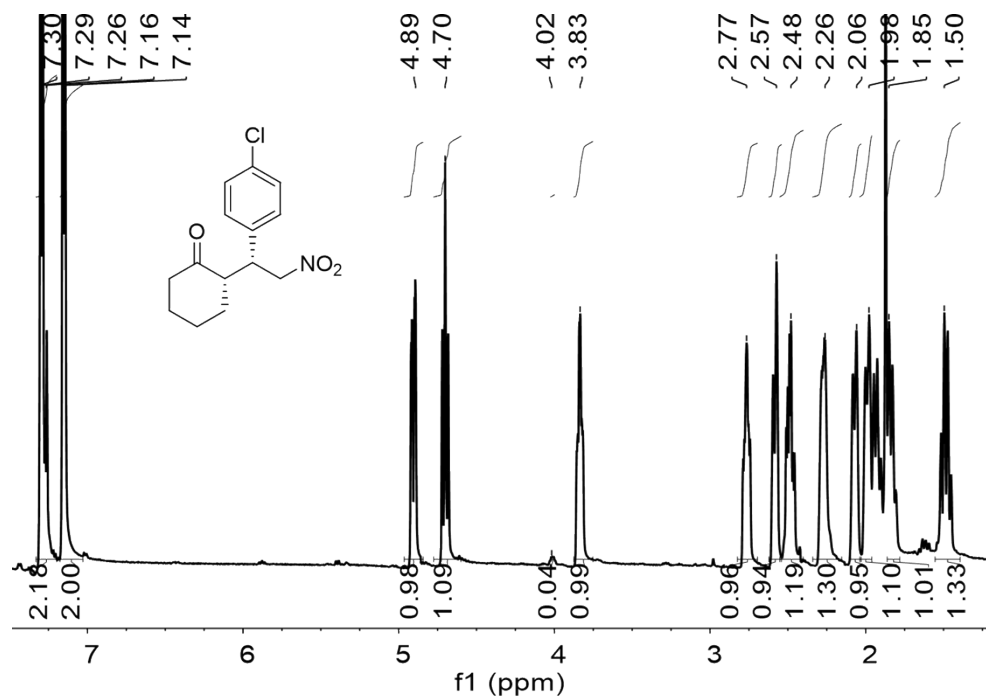

**Figure S18.**  $^1\text{H}$  NMR (600 MHz) spectrum of (*S*)-2-((*R*)-1-(4-chlorophenyl)-2-nitroethyl)cyclohexanone (**6ca**) measured in  $\text{CDCl}_3$  at 25 °C.

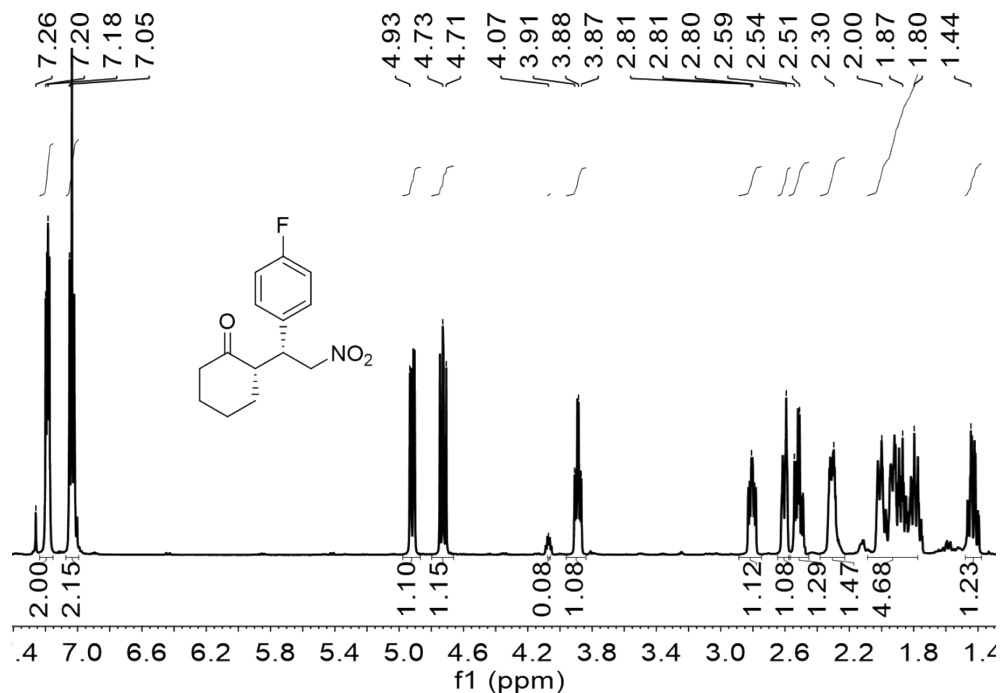

**Figure S19.**  $^1\text{H}$  NMR (600 MHz) spectrum of monomer (*S*)-2-((*R*)-1-(4-fluorophenyl)-2-nitroethyl)cyclohexanone (**6da**) measured in  $\text{CDCl}_3$  at 25 °C.

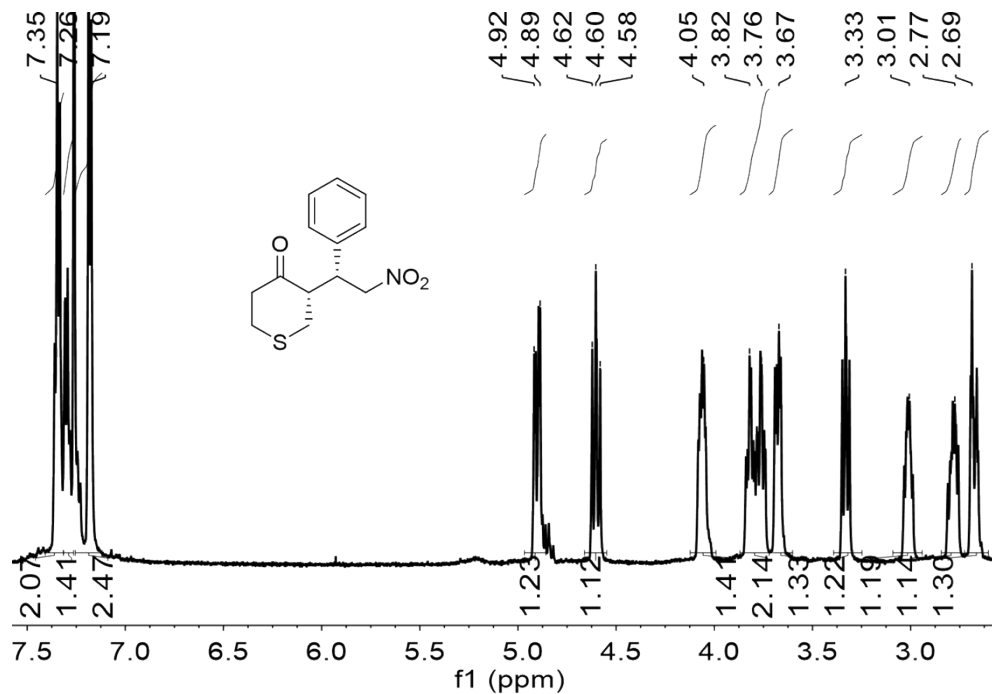

**Figure S20.**  $^1\text{H}$  NMR (600 MHz) spectrum of (*S*)-tetrahydro-3-((*R*)-2-nitro-1-phenylethyl)thiopyran-4-one (**6ab**) measured in  $\text{CDCl}_3$  at 25 °C.

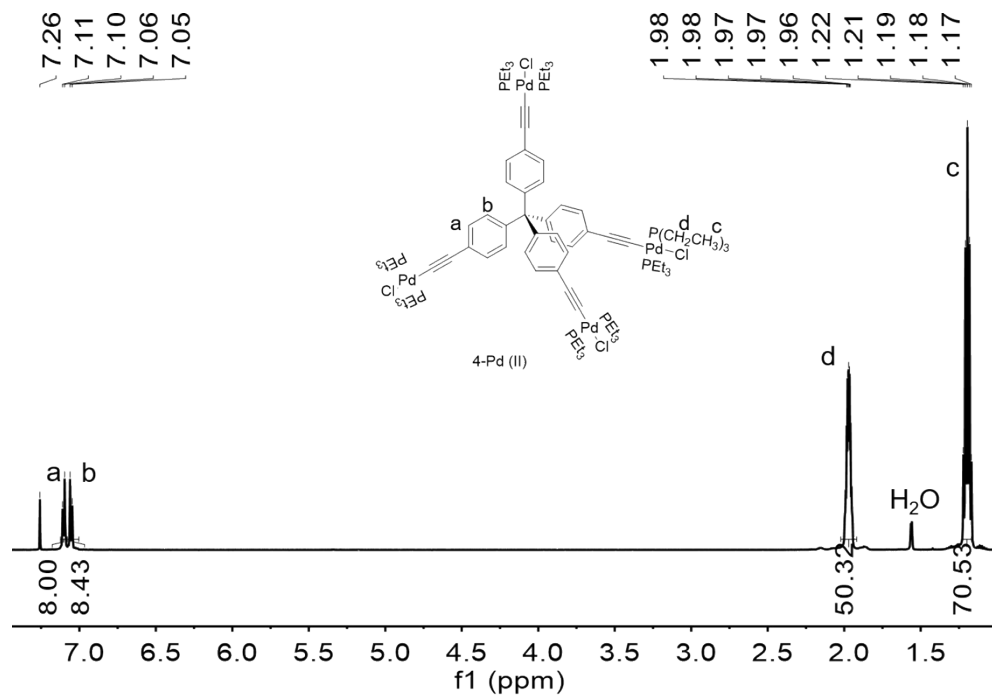

Figure S21.  $^1\text{H}$  NMR (600 MHz) spectrum of 4-Pd(II) measured in  $\text{CDCl}_3$  at 25  $^\circ\text{C}$ .

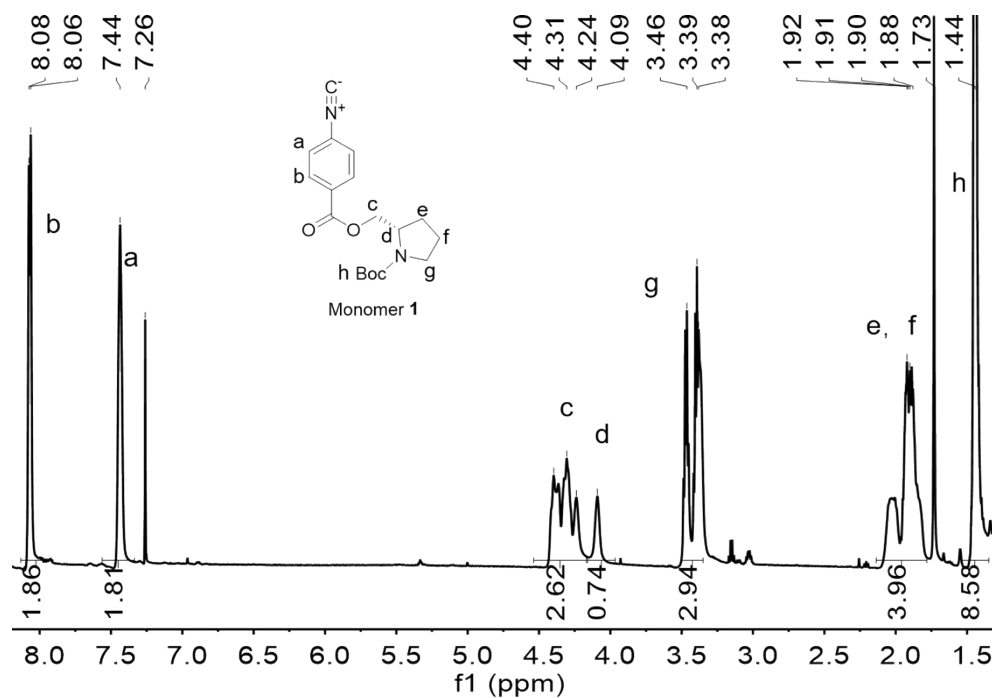

Figure S22.  $^1\text{H}$  NMR (600 MHz) spectrum of monomer 1 measured in  $\text{CDCl}_3$  at 25  $^\circ\text{C}$ .

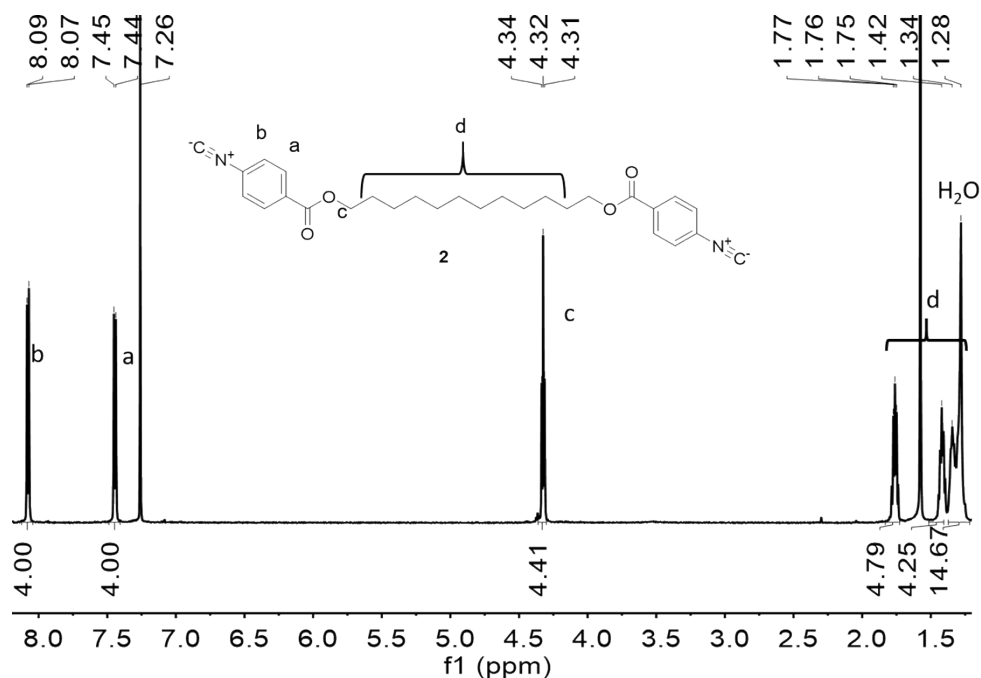

**Figure S23.**  $^1\text{H}$  NMR (600 MHz) spectrum of cross-linker **2** measured in  $\text{CDCl}_3$  at  $25^\circ\text{C}$ .

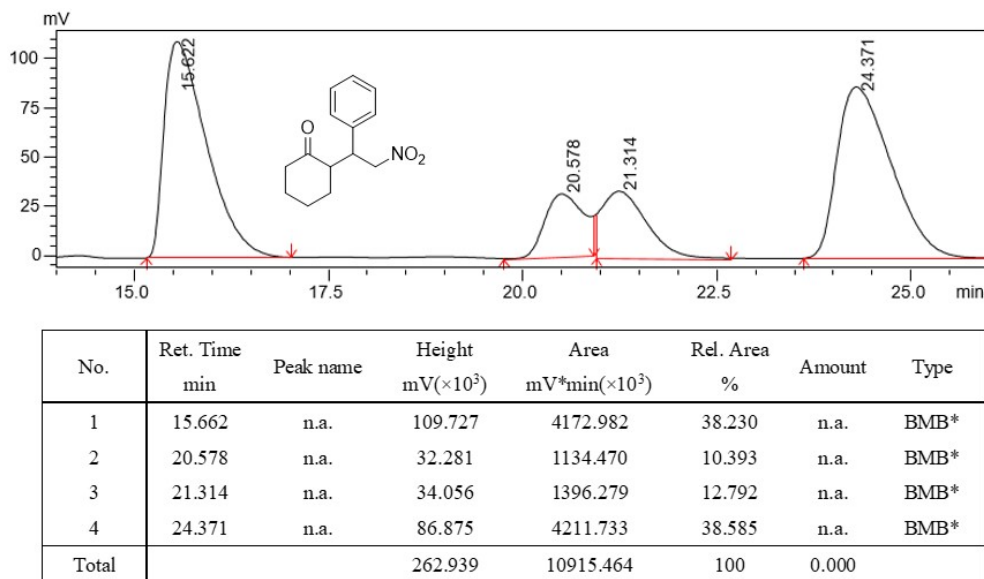

**Figure S24.** HPLC curve of racemic (2-nitro-1-phenylethyl)cyclohexanone (**6aa**) (Chiralpak AS-H;  $n$ -hexane/ $i$ -PrOH = 90/10 (v/v); 1.00 mL/min; 254 nm;  $25^\circ\text{C}$ ).

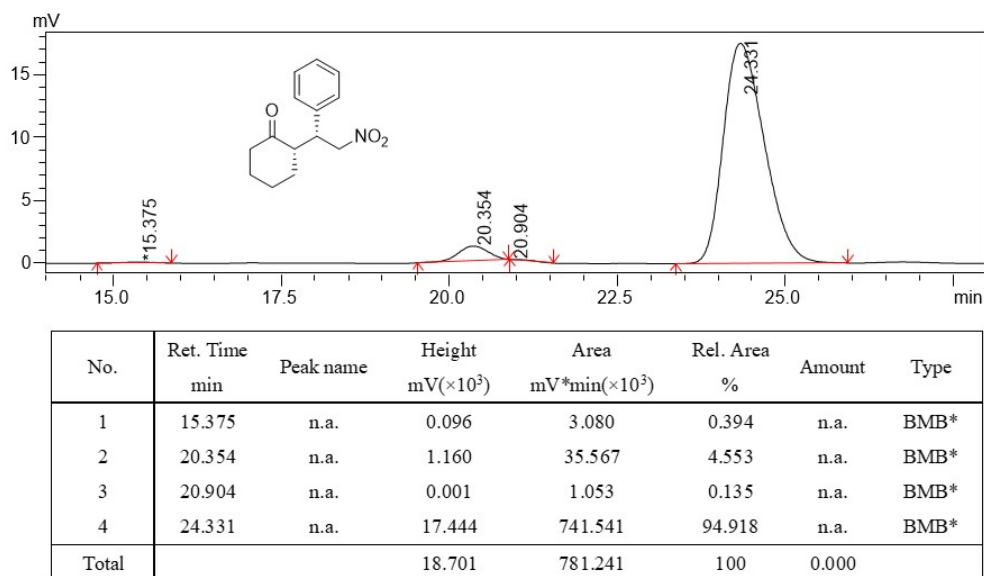

**Figure S25.** HPLC curve of (*S*)-2-((*R*)-2-nitro-1-phenylethyl)cyclohexanone (**6aa**) (Chiralpak AS-H; *n*-hexane/*i*-PrOH = 90/10 (v/v); 1.00 mL/min; 254 nm; 25 °C).

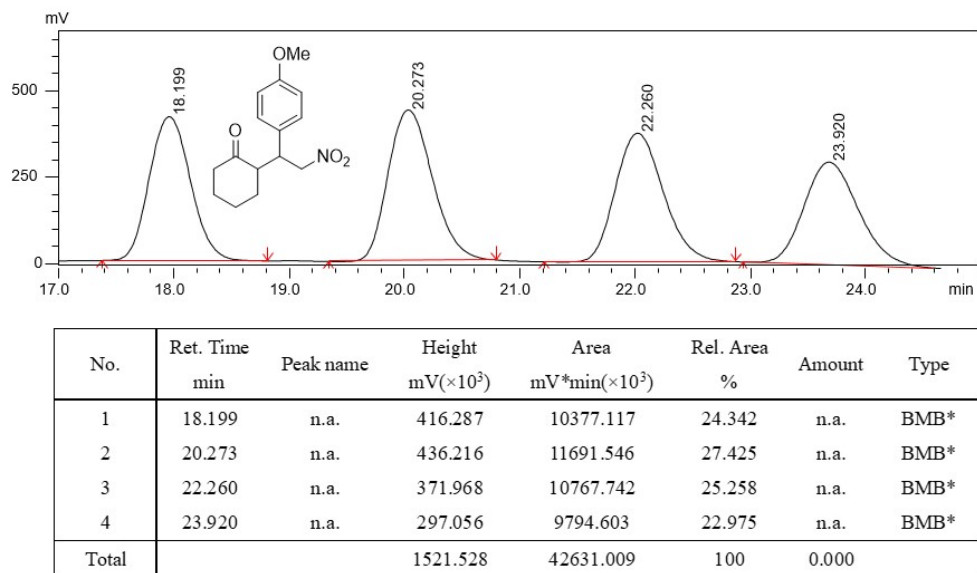

**Figure S26.** HPLC curve of racemic 1-(4-methoxyphenyl)-2-nitroethyl)cyclohexanone (**6ba**) (Chiralpak AD-H; *n*-hexane/*i*-PrOH = 80/20 (v/v); 0.50 mL/min; 254 nm; 25 °C).



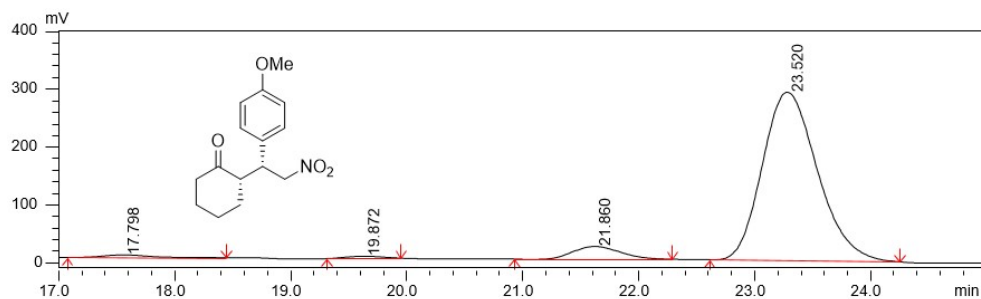

| No.   | Ret. Time<br>min | Peak name | Height<br>mV( $\times 10^3$ ) | Area<br>mV*min( $\times 10^3$ ) | Rel. Area<br>% | Amount | Type |
|-------|------------------|-----------|-------------------------------|---------------------------------|----------------|--------|------|
| 1     | 17.798           | n.a.      | 1.456                         | 55.097                          | 0.620          | n.a.   | BMB* |
| 2     | 19.872           | n.a.      | 10.051                        | 81.846                          | 0.921          | n.a.   | BMB* |
| 3     | 21.860           | n.a.      | 21.264                        | 346.314                         | 3.897          | n.a.   | BMB* |
| 4     | 23.520           | n.a.      | 253.999                       | 8395.441                        | 94.472         | n.a.   | BMB* |
| Total |                  |           | 286.770                       | 8886.698                        | 100            | 0.000  |      |

**Figure S27.** HPLC curve of (*S*)-2-((*R*)-1-(4-methoxyphenyl)-2-nitroethyl) cyclohexanone (**6ba**) (Chiralpak AD-H; *n*-hexane/*i*-PrOH = 80/20 (v/v); 0.50 mL/min; 254 nm; 25 °C).

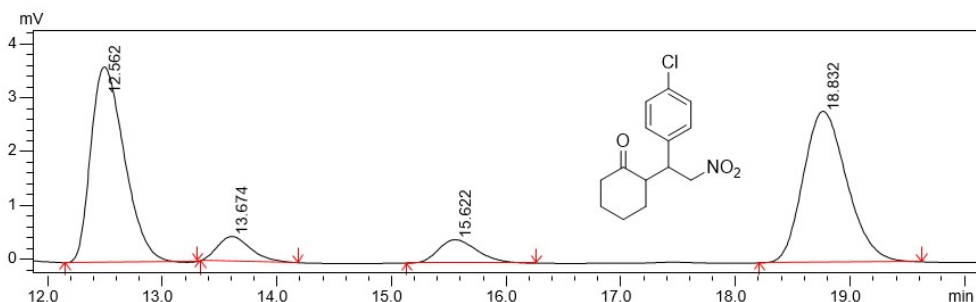

| No.   | Ret. Time<br>min | Peak name | Height<br>mV( $\times 10^3$ ) | Area<br>mV*min( $\times 10^3$ ) | Rel. Area<br>% | Amount | Type |
|-------|------------------|-----------|-------------------------------|---------------------------------|----------------|--------|------|
| 1     | 12.562           | n.a.      | 362.721                       | 738.236                         | 43.918         | n.a.   | BMB* |
| 2     | 13.674           | n.a.      | 45.903                        | 930.056                         | 5.533          | n.a.   | BMB* |
| 3     | 15.622           | n.a.      | 43.656                        | 104.125                         | 6.194          | n.a.   | BMB* |
| 4     | 18.832           | n.a.      | 280.458                       | 745.568                         | 44.355         | n.a.   | BMB* |
| Total |                  |           | 732.738                       | 168.091                         | 100            | 0.000  |      |

**Figure S28.** HPLC curve of racemic (*S*)-2-((*R*)-1-(4-chlorophenyl)-2-nitroethyl) cyclohexanone (**6ca**) (Chiralpak AD-H; *n*-hexane/*i*-PrOH = 90/10 (v/v); 0.50 mL/min; 254 nm; 25 °C).

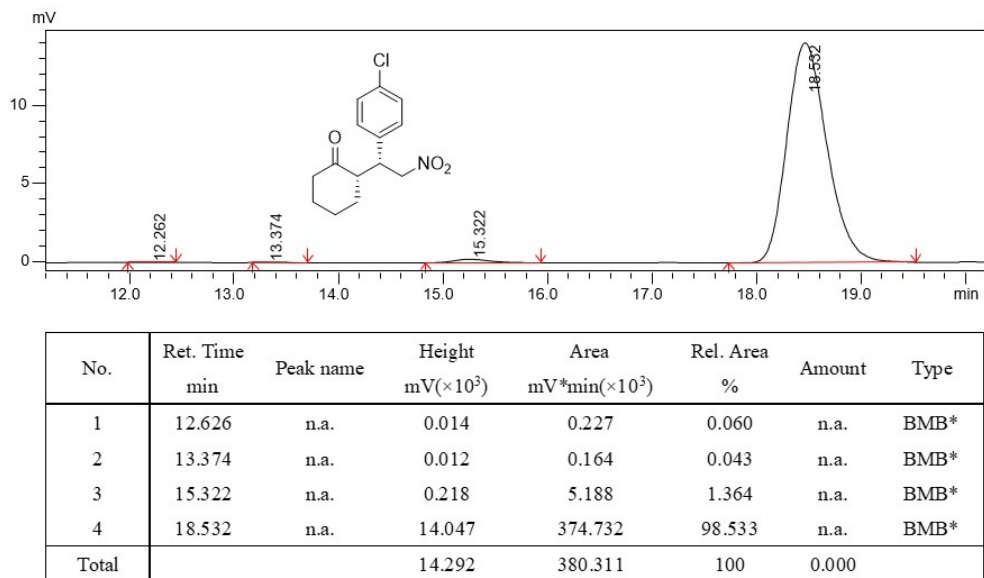

**Figure S29.** HPLC curve of (*S*)-2-((*R*)-1-(4-chlorophenyl)-2-nitroethyl)cyclohexanone (**6ca**) (Chiralpak AD-H; *n*-hexane/*i*-PrOH = 90/10 (v/v); 1.00 mL/min; 210 nm; 25 °C).

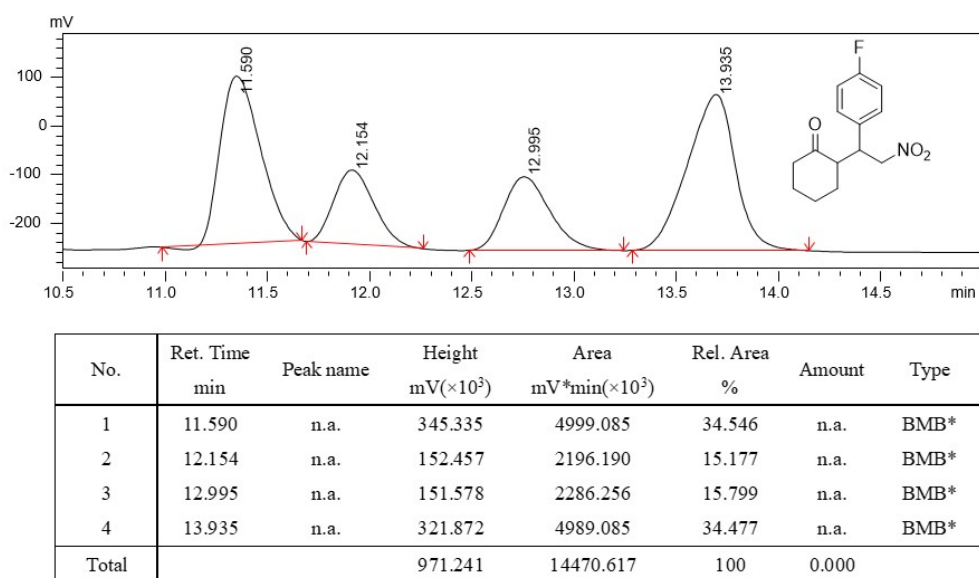

**Figure S30.** HPLC curve of racemic 1-(4-Fluorophenyl)-2-nitroethyl)cyclohexanone (**6da**) (Chiralpak AD-H; *n*-hexane/*i*-PrOH = 75/25 (v/v); 0.70 mL/min; 254 nm; 25 °C).

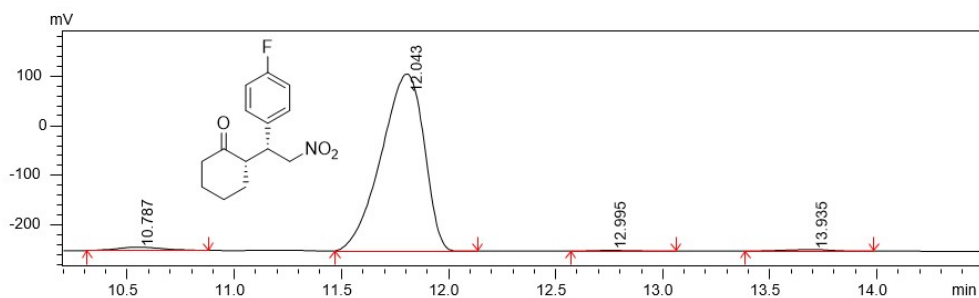

| No.   | Ret. Time<br>min | Peak name | Height<br>mV( $\times 10^3$ ) | Area<br>mV*min( $\times 10^3$ ) | Rel. Area<br>% | Amount | Type |
|-------|------------------|-----------|-------------------------------|---------------------------------|----------------|--------|------|
| 1     | 10.787           | n.a.      | 7.389                         | 111.467                         | 2.154          | n.a.   | BMB* |
| 2     | 12.043           | n.a.      | 357.746                       | 4996.148                        | 96.542         | n.a.   | BMB* |
| 3     | 12.995           | n.a.      | 1.387                         | 19.757                          | 0.382          | n.a.   | BMB* |
| 4     | 13.935           | n.a.      | 3.097                         | 47.727                          | 0.922          | n.a.   | BMB* |
| Total |                  |           | 369.618                       | 5175.098                        | 100            | 0.000  |      |

**Figure S31.** HPLC curve of (*S*)-2-((*R*)-1-(4-fluorophenyl)-2-nitroethyl)cyclohexanone (**6da**) (Chiralpak AD-H; *n*-hexane/*i*-PrOH = 75/25 (v/v); 0.70 mL/min; 254 nm; 25 °C).

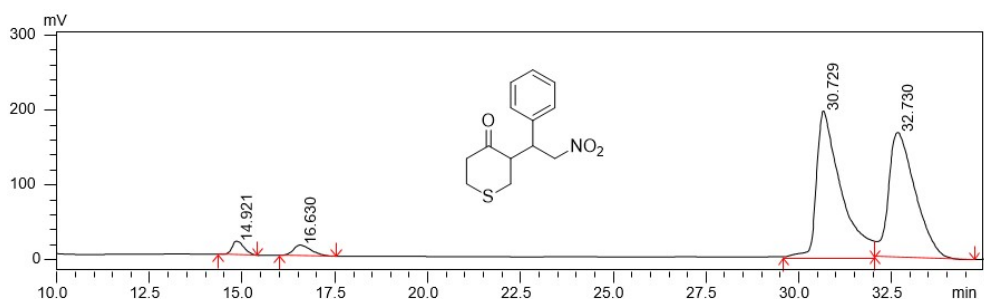

| No.   | Ret. Time<br>min | Peak name | Height<br>mV( $\times 10^3$ ) | Area<br>mV*min( $\times 10^3$ ) | Rel. Area<br>% | Amount | Type |
|-------|------------------|-----------|-------------------------------|---------------------------------|----------------|--------|------|
| 1     | 14.921           | n.a.      | 18.490                        | 417.602                         | 2.283          | n.a.   | BMB* |
| 2     | 16.630           | n.a.      | 13.964                        | 470.793                         | 2.573          | n.a.   | BMB* |
| 3     | 30.729           | n.a.      | 196.005                       | 8772.725                        | 47.952         | n.a.   | BMB* |
| 4     | 32.730           | n.a.      | 166.253                       | 8633.800                        | 47.192         | n.a.   | BMB* |
| Total |                  |           | 394.713                       | 18294.920                       | 100            | 0.000  |      |

**Figure S32.** HPLC curve of racemic tetrahydro-3-(2-nitro-1-phenylethyl)thiopyran-4-one (**6ab**) (Chiralpak AD-H; *n*-hexane/*i*-PrOH = 85/15 (v/v); 1.00 mL/min; 230 nm; 25 °C)

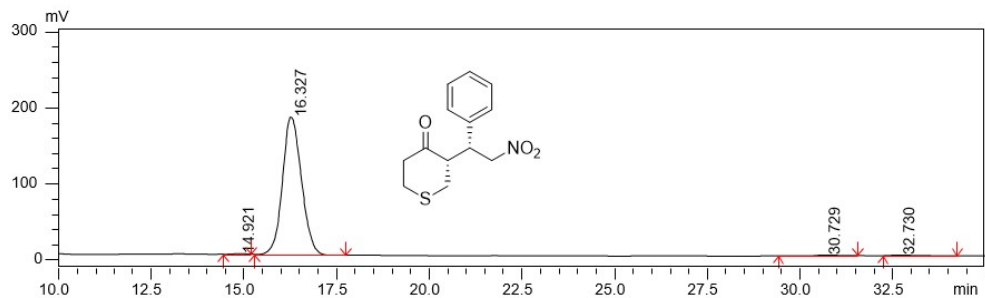

| No.   | Ret. Time<br>min | Peak name | Height<br>mV( $\times 10^3$ ) | Area<br>mV*min( $\times 10^3$ ) | Rel. Area<br>% | Amount | Type |
|-------|------------------|-----------|-------------------------------|---------------------------------|----------------|--------|------|
| 1     | 14.921           | n.a.      | 0.438                         | 15.576                          | 0.238          | n.a.   | BMB* |
| 2     | 16.327           | n.a.      | 182.563                       | 6462.114                        | 99.300         | n.a.   | BMB* |
| 3     | 30.729           | n.a.      | 0.441                         | 35.372                          | 0.240          | n.a.   | BMB* |
| 4     | 32.730           | n.a.      | 0.408                         | 34.163                          | 0.222          | n.a.   | BMB* |
| Total |                  |           | 183.850                       | 6547.226                        | 100            | 0.000  |      |

**Figure S33.** HPLC curve of (*S*)-tetrahydro-3-((*R*)-2-nitro-1-phenylethyl)thiopyran-4-one (**6ab**) (Chiralpak AD-H; *n*-hexane/*i*-PrOH = 85/15 (v/v); 0.50 mL/min; 230 nm; 25 °C).

## References

- (1) Y.-X. Xue, Y.-Y. Zhu, L.-M. Gao, X.-Y. He, N. Liu, W.-Y. Zhang, J. Yin, Y. Ding, H. Zhou, Z.-Q. Wu, *J. Am. Chem. Soc.* **2014**, *136*, 4706–4713.
- (2) L. Shen, L. Xu, X.-H. Hou, N. Liu, Z.-Q. Wu, *Macromolecules* **2018**, *51*, 9547–9554.
- (3) X.-H. Xu, Y.-X. Li, L. Zhou, N. Liu, Z.-Q. Wu, *Chem. Sci.* **2022**, *13*, 1111–1118.
- (4) B. Tan, X.-F. Zeng, Y.-P. Lu, P.-J. Chua, *Org. Lett.* **2009**, *11*, 1927–1930.
- (5) D. Fairhurst, T. Cosgrove, S. W. Prescott, *Magn. Reson. Chem.* **2016**, *54*, 521–526.
- (6) T. Cosgrove, S. Stebbing, M. Ackroyd, D. Fairhurst, K. Sanderson, S. W. Prescott, *Powder Technology* **2023**, *414*, 118065.
